# Supplementary material for: Laser-Induced Combinatorial Chemotherapeutic, Chemodynamic, and Photothermal Therapy for Hepatocellular Carcinoma Based on Oxaliplatin-Loaded Metal–Organic Frameworks
Source: PubMed Central journal article supplement — ACS Appl Mater Interfaces. 2023 Jan 11;15(3):3781–90. doi: 10.1021/acsami.2c19305 (PMC9881001; doi:10.1021/acsami.2c19305), 2023-01-11
Supplement: am2c19305_si_001.pdf [file am2c19305_si_001.pdf]

Supporting Information

**Laser-induced Combinatorial Chemotherapeutic, Chemodynamic, and Photothermal Therapy for Hepatocellular Carcinoma based on Oxaliplatin-loaded Metal-Organic Frameworks**

*Run Huang<sup>1,2</sup>, Weiren Liu<sup>1,2</sup>, Qinghao Zhang<sup>3</sup>, Guiqi Zhu<sup>1,2</sup>, Weifeng Qu<sup>1,2</sup>, Chenyang Tao<sup>1,2</sup>, Jun Gao<sup>1,2</sup>, Yuan Fang<sup>1,2</sup>, Xiutao Fu<sup>1,2</sup>, Jian Zhou<sup>1,2</sup>, Yinghong Shi<sup>1,2\*</sup>, Jia Fan<sup>1,2\*</sup>, Zheng Tang<sup>1,2\*</sup>*

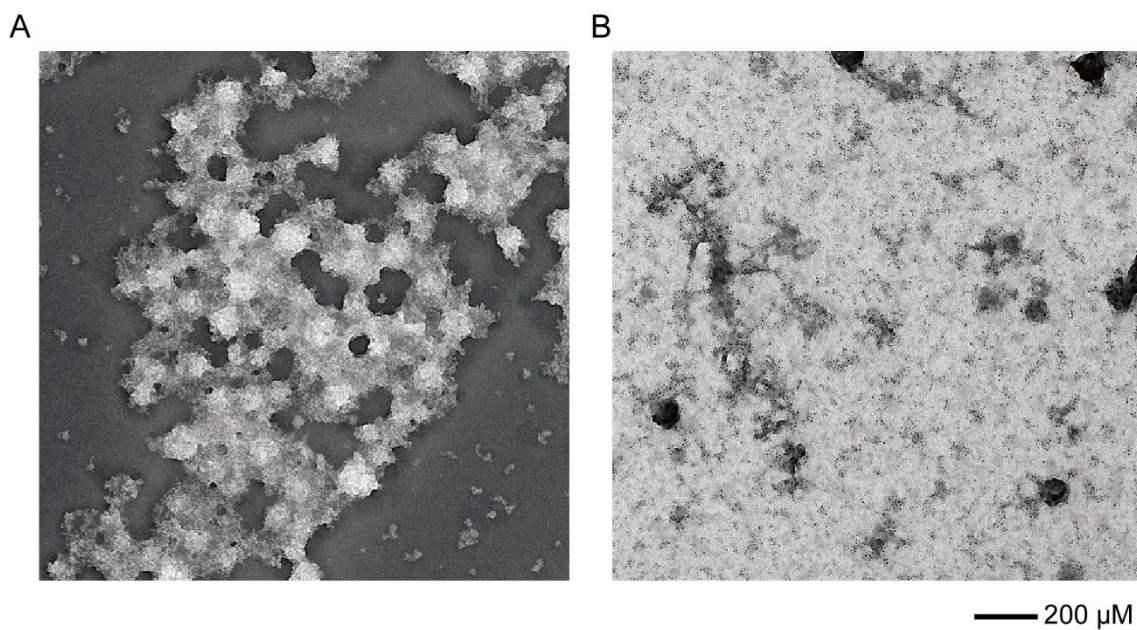

**Figure S1**, Representative TEM images of degradation of MOF after incubation for 3h in PBS with pH 6.5 (A) and 5.6 (B).

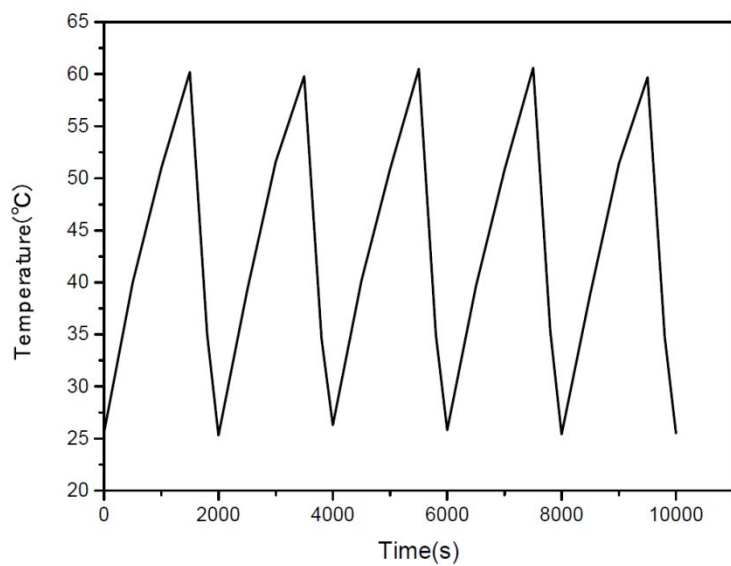

**Figure S2**, Heating and cooling curves of MIL-PDA-PEGTK under laser irradiation (808 nm, 1 W/cm<sup>-2</sup>).

•

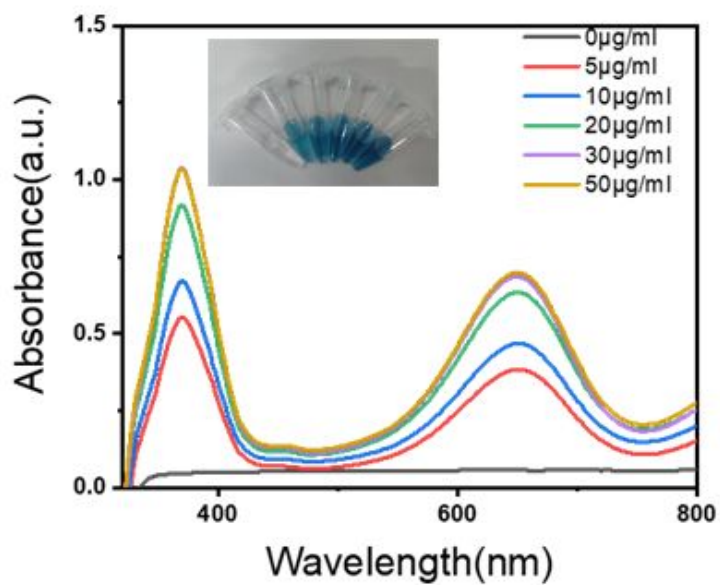

**Figure S3**, *In vitro* catalytic performance of nanoparticles. Chromogenic reaction of TMB under different nanoparticles concentrations (1 mM H<sub>2</sub>O<sub>2</sub>, pH = 5.6).

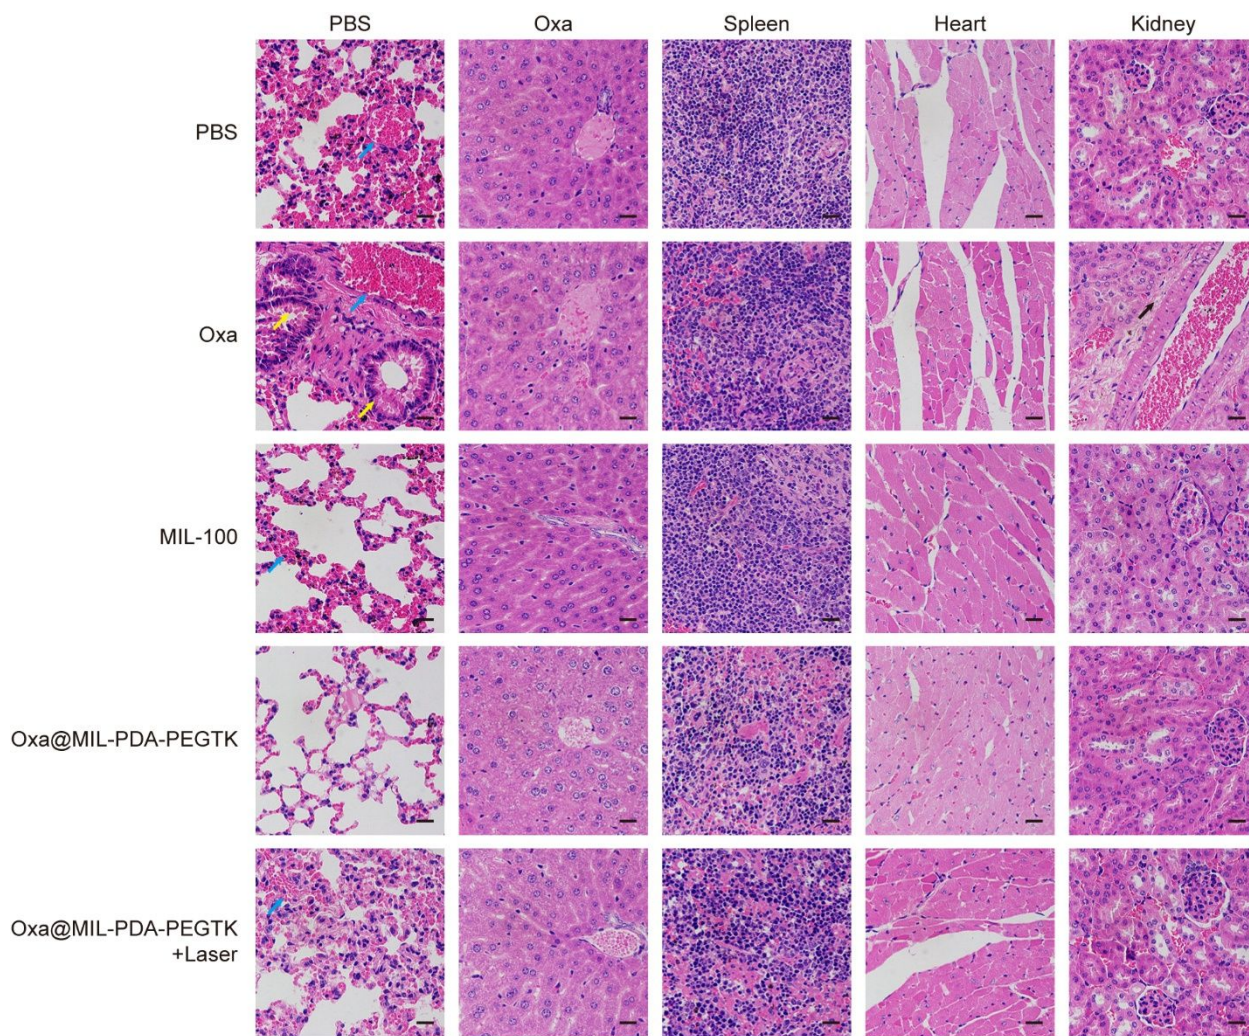

**Figure S4**, Histopathological images of main organs at the end of treatment.

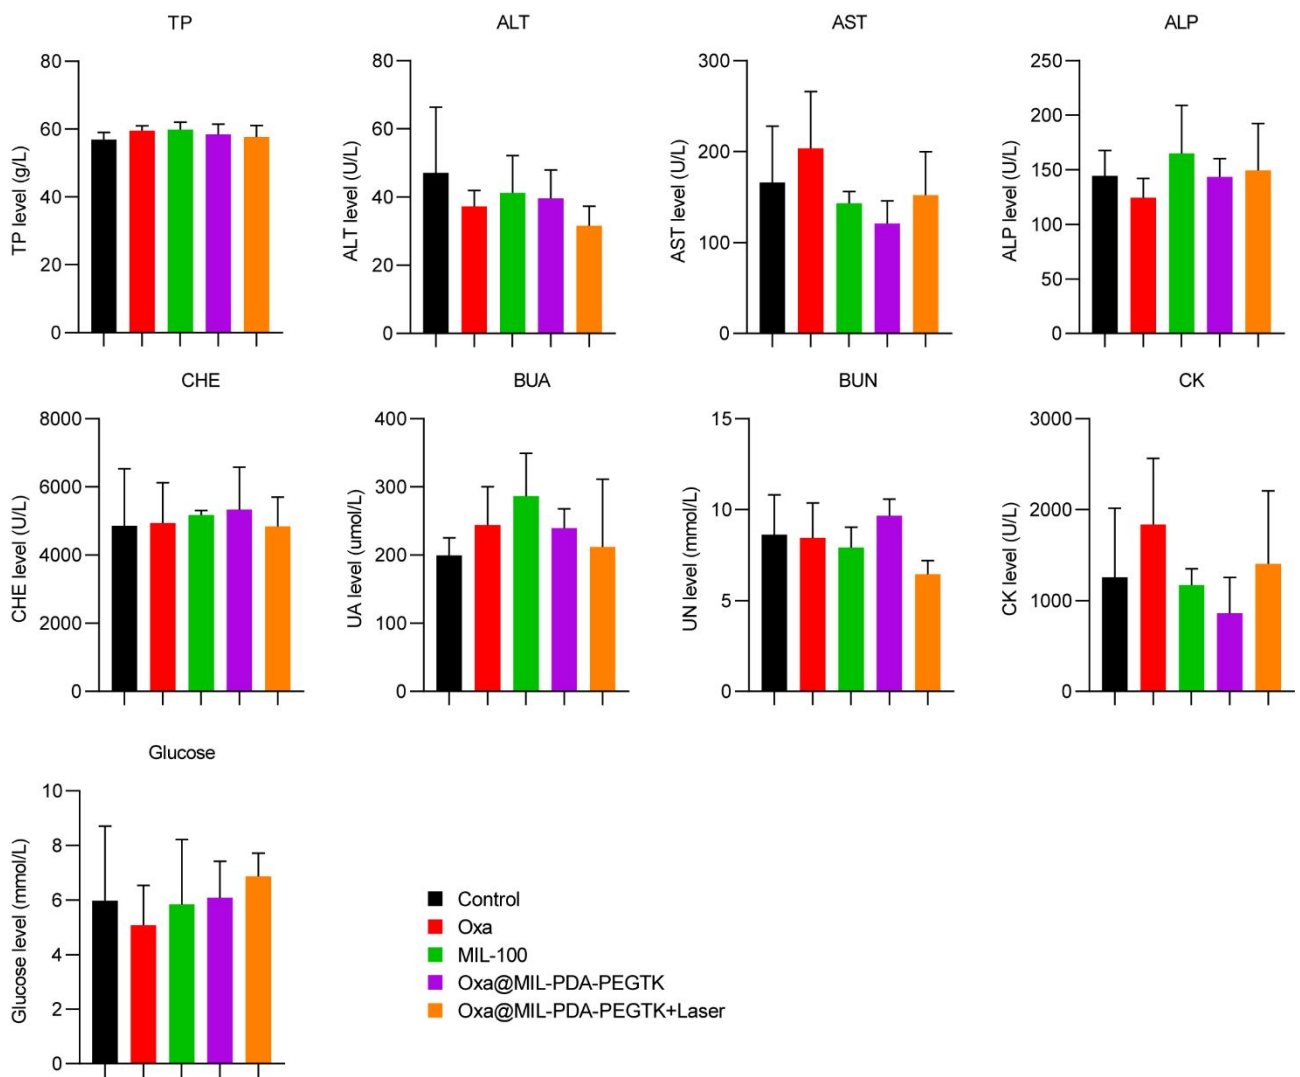

**Figure S5**, Mouse blood serum analysis testing the biochemical markers of liver function, kidney function, and heart function.
